# Supplementary material
Source: PubMed Central journal article supplement (PMC6820162)

**Figure S1**

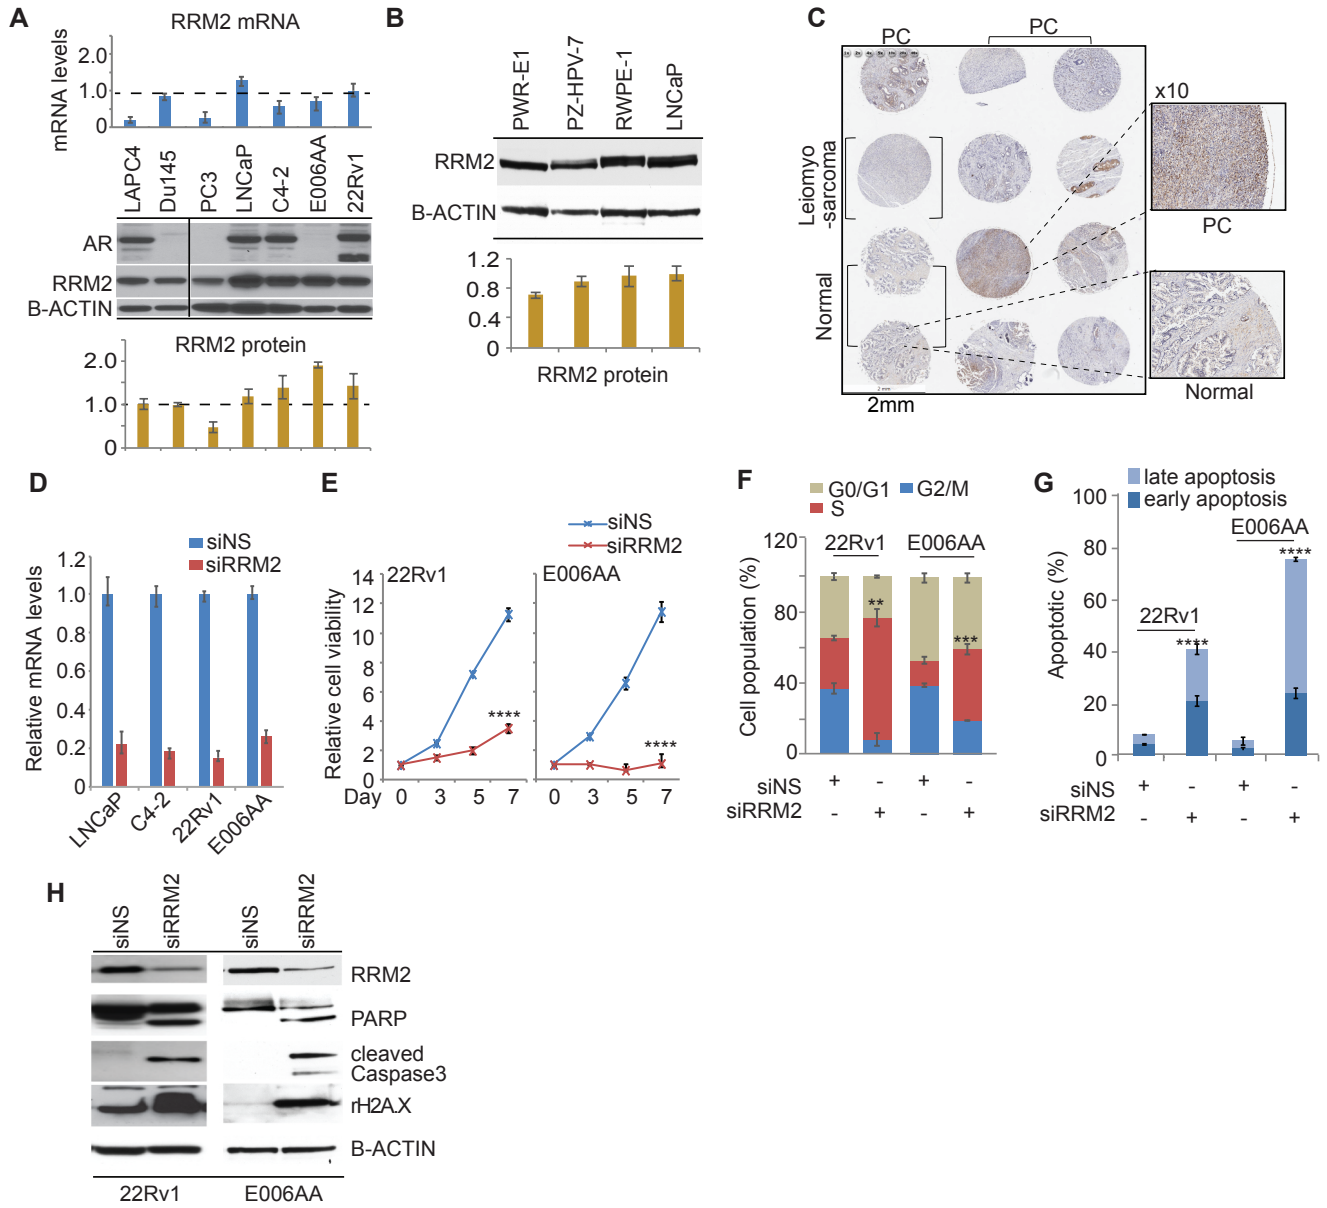

Supplement: NIHMS1527095-supplement-2.pdf [file NIHMS1527095-supplement-2.pdf]

Figure S2

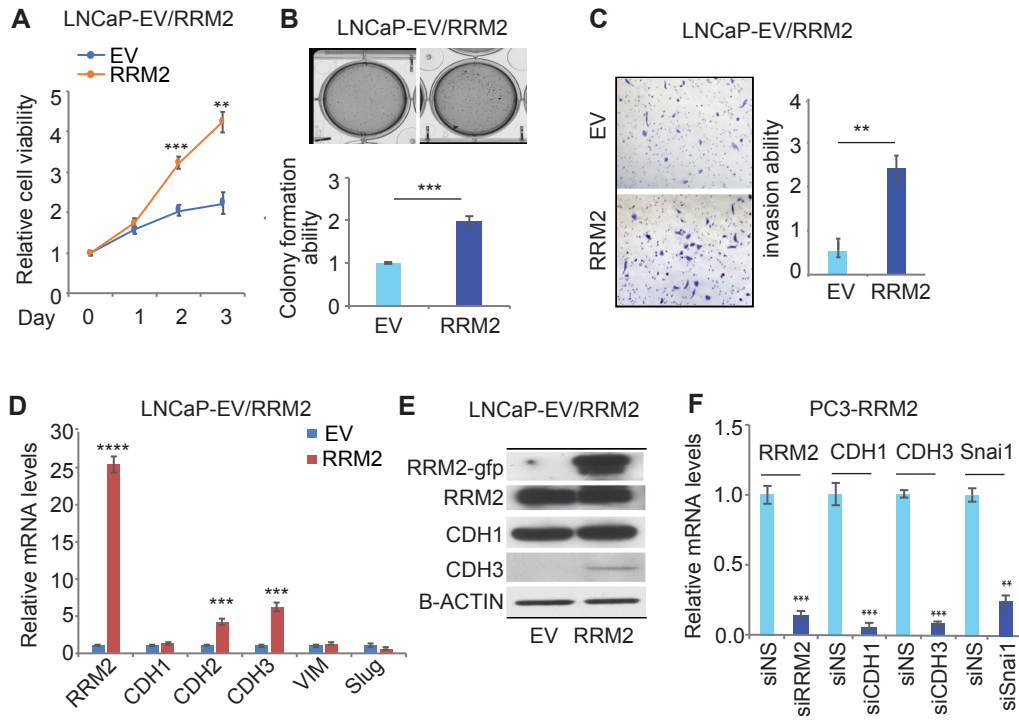

Supplement: NIHMS1527095-supplement-3.pdf [file NIHMS1527095-supplement-3.pdf]

**Figure S3**

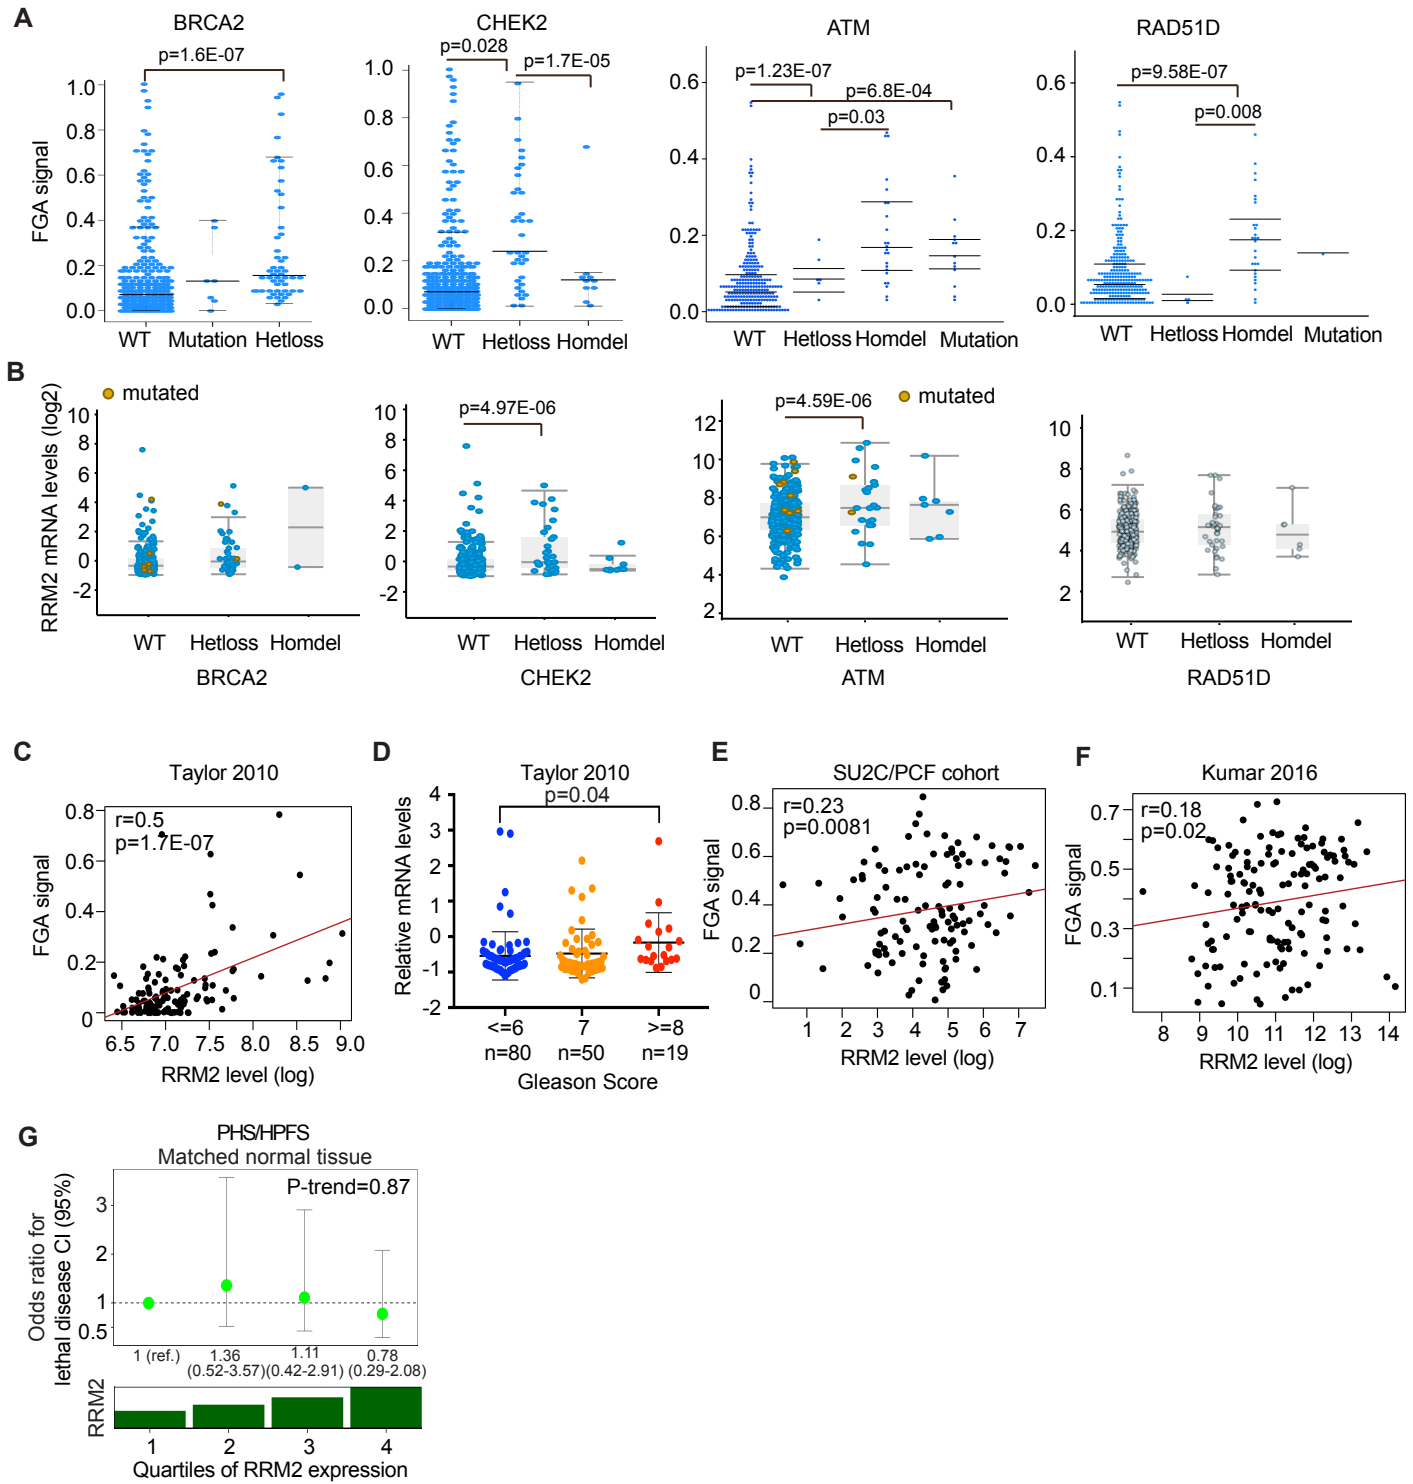

Supplement: NIHMS1527095-supplement-4.pdf [file NIHMS1527095-supplement-4.pdf]

Figure S4

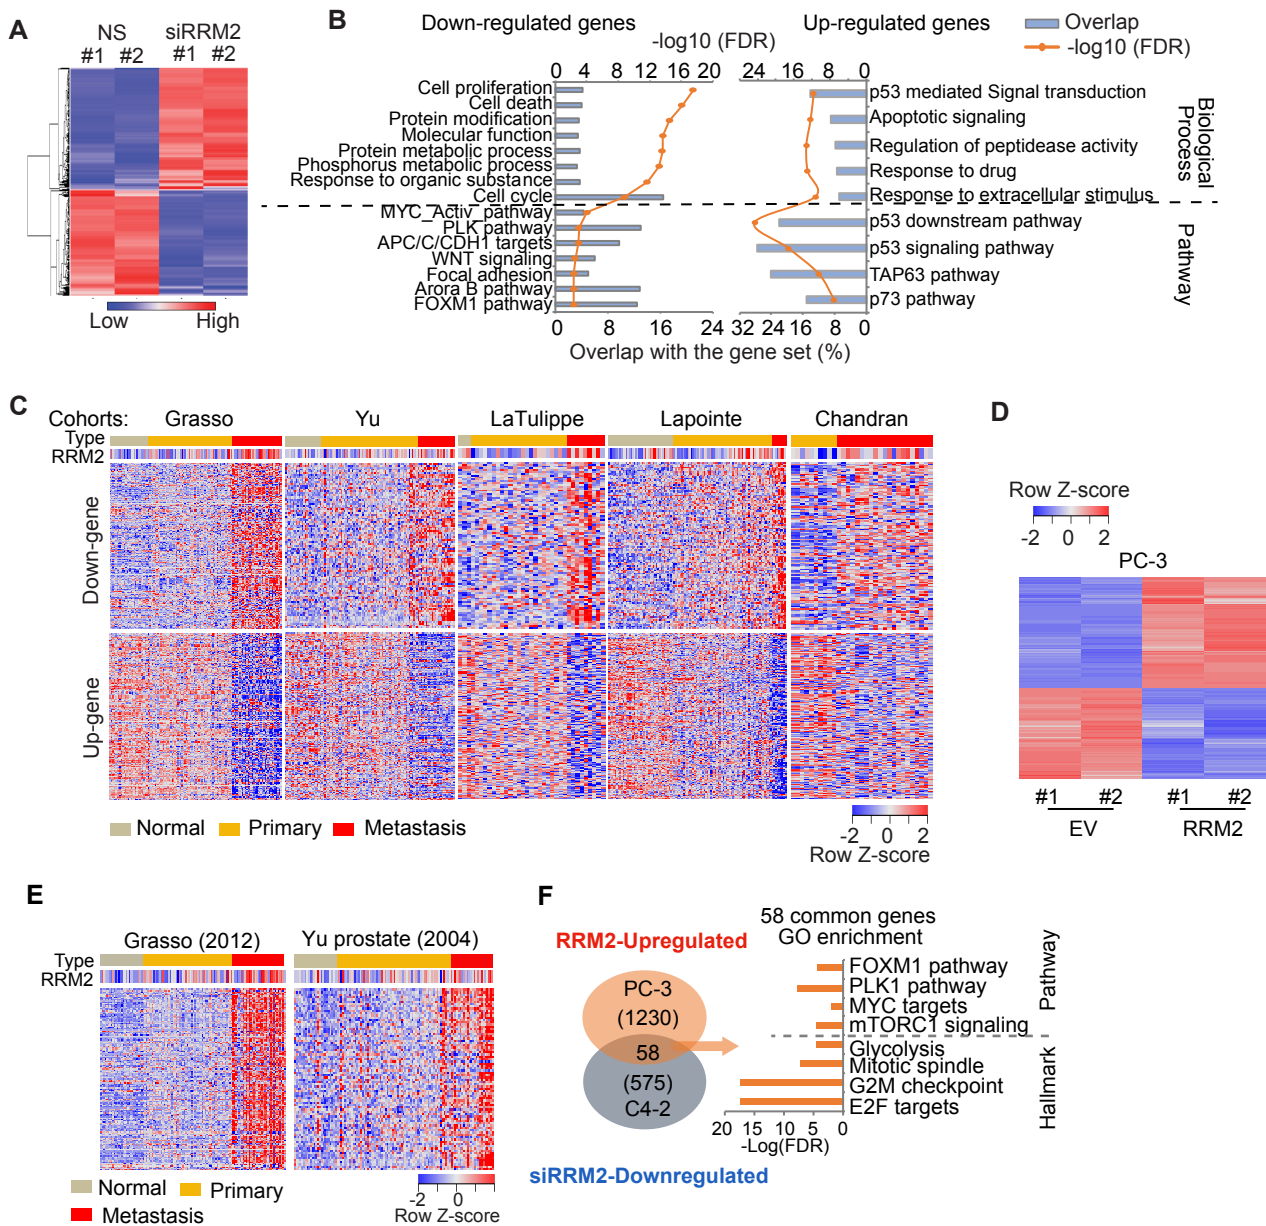

Supplement: NIHMS1527095-supplement-5.pdf [file NIHMS1527095-supplement-5.pdf]

Figure S5

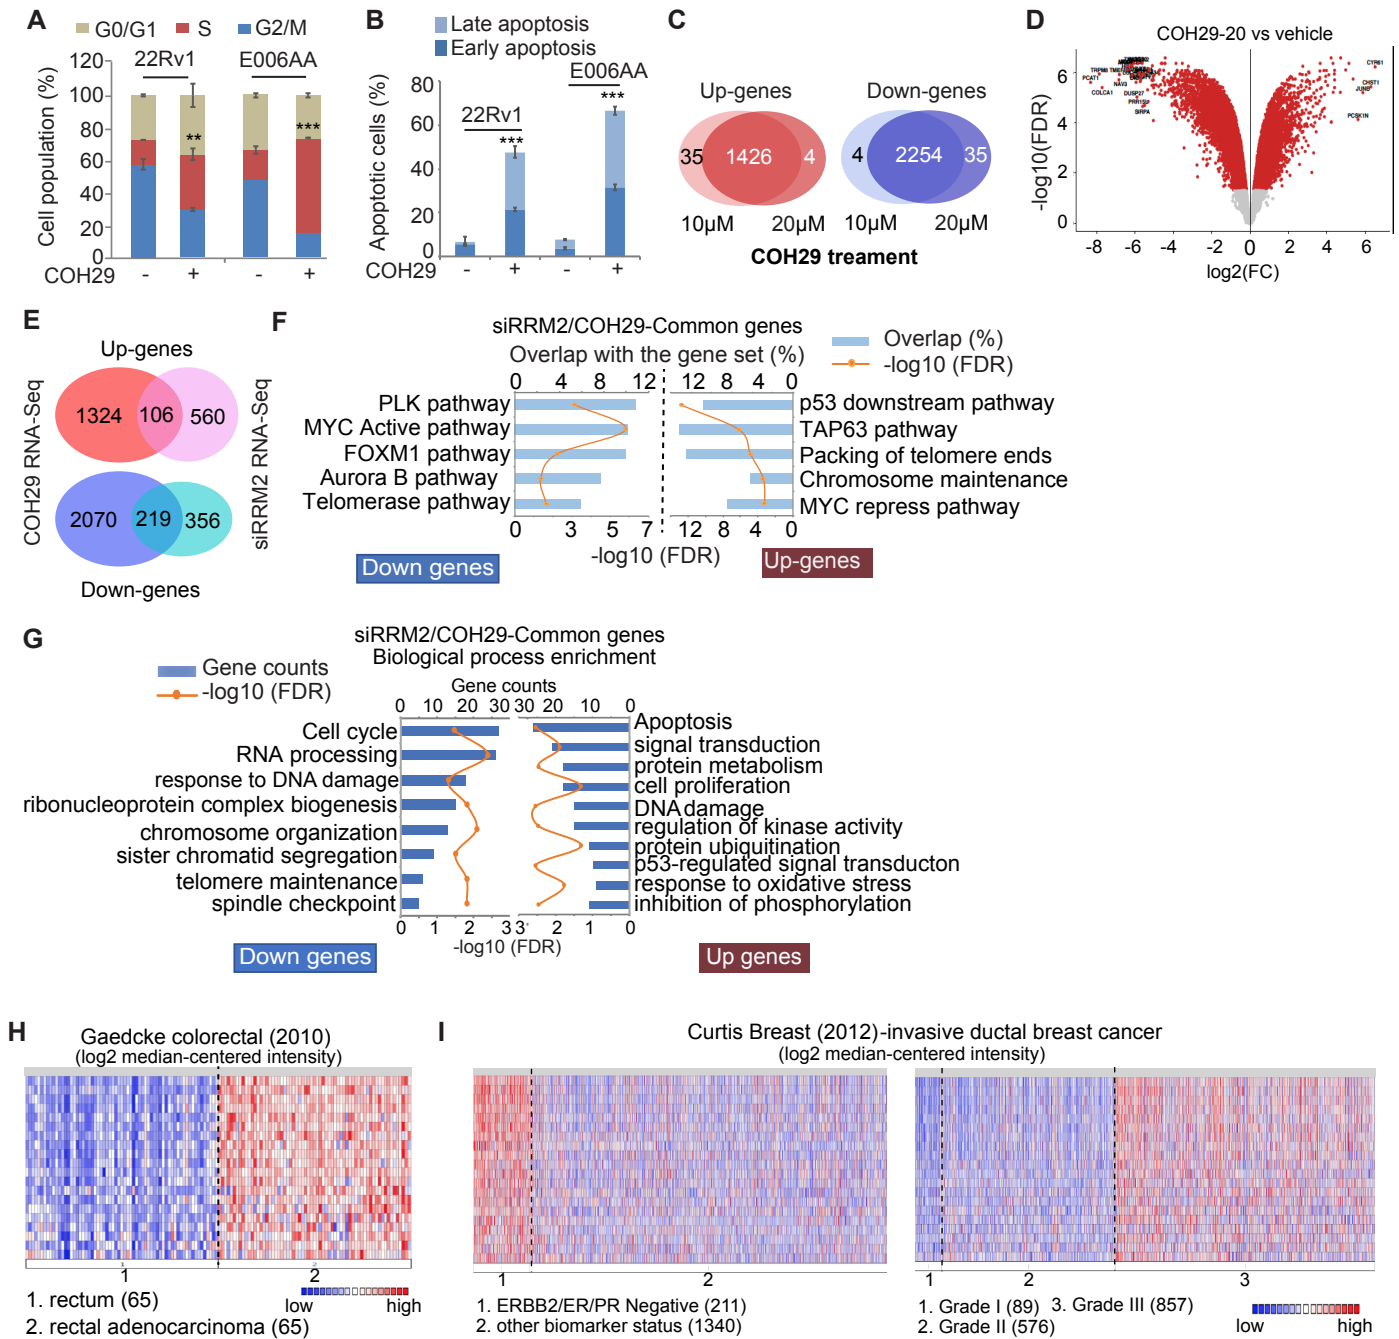

Supplement: NIHMS1527095-supplement-6.pdf [file NIHMS1527095-supplement-6.pdf]

**Figure S6**

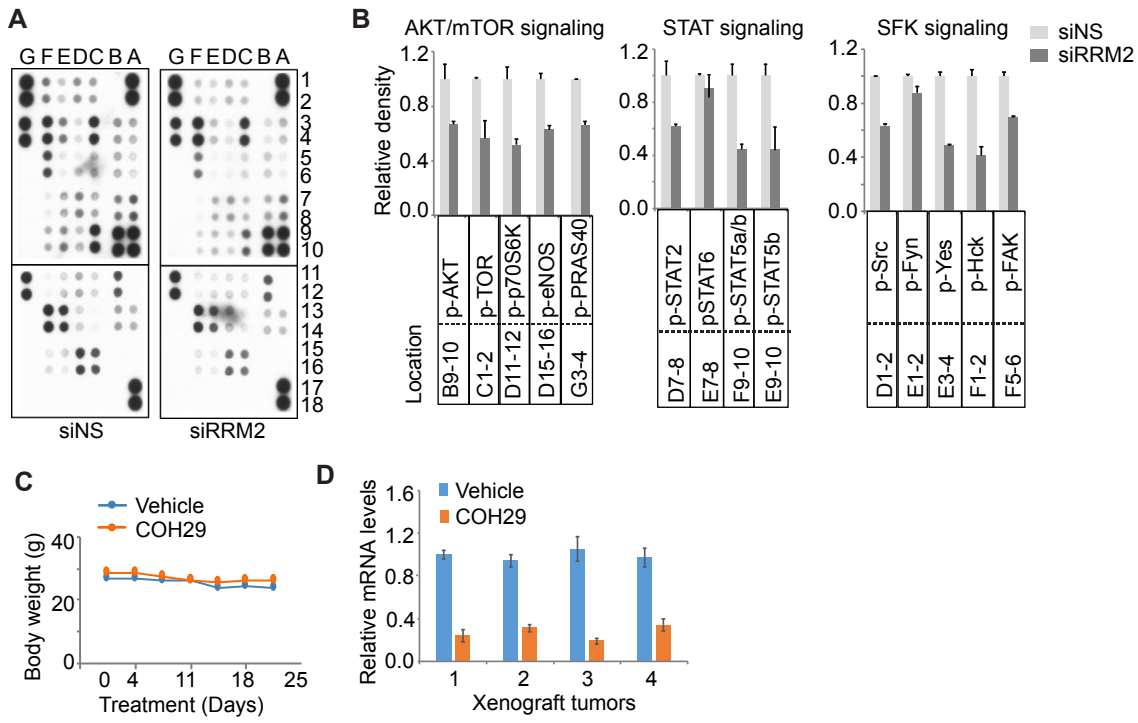

Supplement: NIHMS1527095-supplement-7.pdf [file NIHMS1527095-supplement-7.pdf]

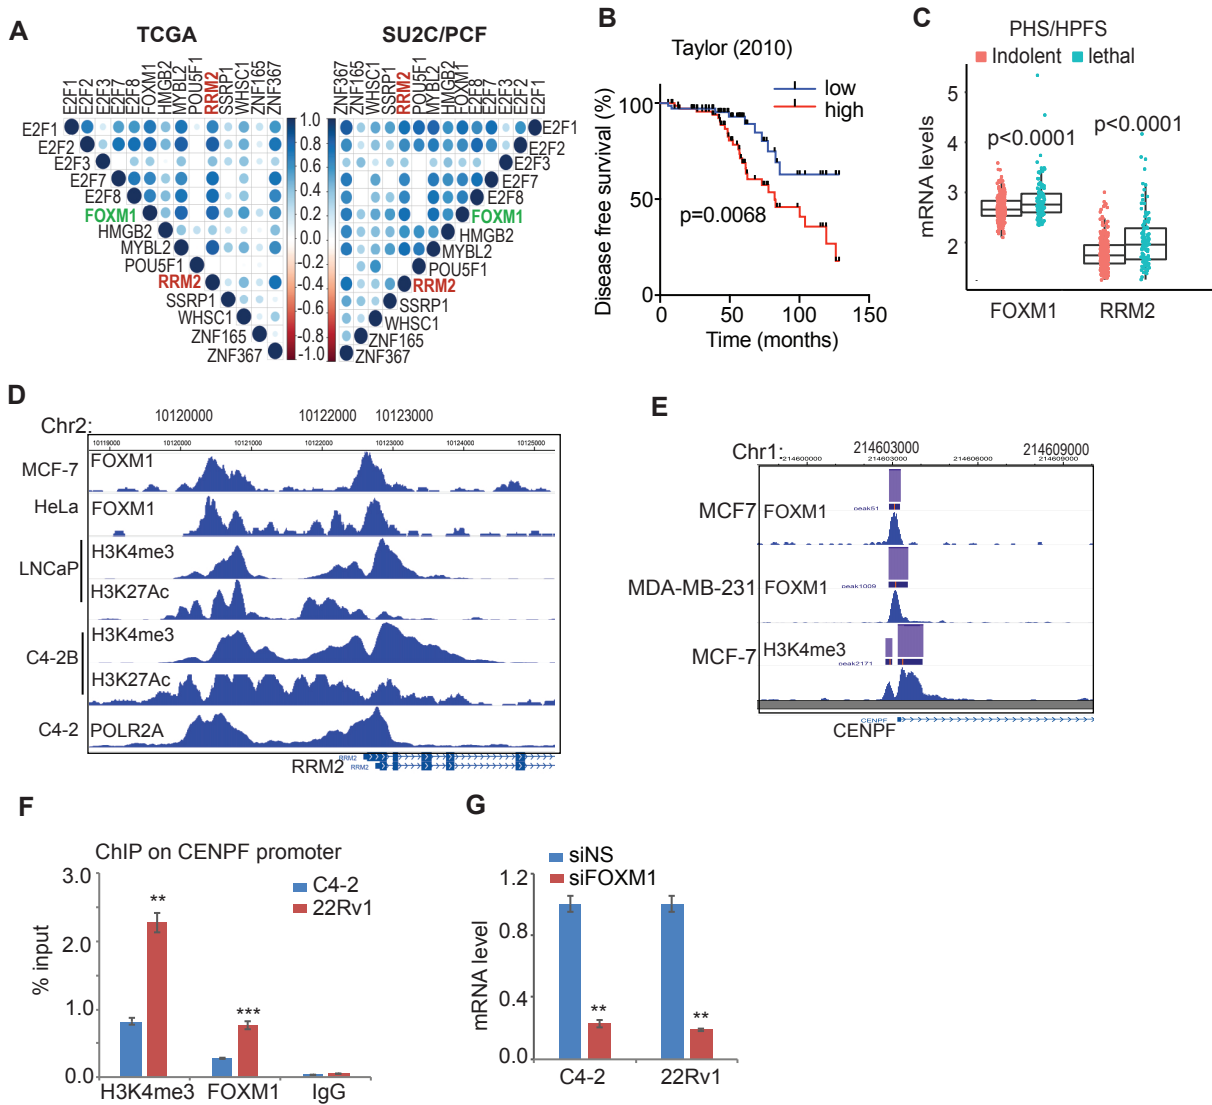

Supplement: NIHMS1527095-supplement-8.pdf [file NIHMS1527095-supplement-8.pdf]
